# Supplementary material for: Public transit mobility as a leading indicator of COVID-19 transmission in 40 cities during the first wave of the pandemic
Source: PeerJ. 2024 May 31;12:e17455. doi: 10.7717/peerj.17455 (PMC11146320; doi:10.7717/peerj.17455)
Supplement: Supplemental Information 3 — Model coefficients are presented with and without adjustment for days since 100th case. Models include outcome data from March 30–April 12 for 40 cities. a Coefficient for a 10% decrease in the mobility index. b Coefficient for a 10-day increase since the 100th reported case in the country. [file peerj-12-17455-s003.docx]

**Table S3.** Estimated model coefficients (with 95% confidence intervals) for the association between a 10% decrease in the mobility index and the weekly case ratio and effective reproduction number assuming a lag of two or three weeks and using two weeks of data.

Model coefficients are presented with and without adjustment for days since 100th case. Models include outcome data from March 30–April 12 for 40 cities.

|  | **Weekly case ratio (exp(*β*) = ratio of current week to previous week)** | | | |
| --- | --- | --- | --- | --- |
|  | **2-week lag** | | **3-week lag** | |
|  | **Unadjusted** | **Adjusted** | **Unadjusted** | **Adjusted** |
| Mobilitya | 0.848 (0.787, 0.913) | 0.898 (0.829, 0.973) | 0.928 (0.902, 0.956) | 0.948 (0.906, 0.991) |
| Days since 100th caseb |  | 0.787 (0.658, 0.941) |  | 0.867 (0.683, 1.101) |
| Marginal *R2* | 0.238 | 0.291 | 0.164 | 0.200 |
| Conditional *R2* | 0.690 | 0.714 | 0.636 | 0.659 |
| Likelihood ratio test | *χ2*(1) = 6.728, *p* = 0.009 | | *χ2*(1) = 1.369, *p* = 0.242 | |
|  | **Effective reproduction number (*β* = *ΔRt*)** | | | |
|  | **2-week lag** | | **3-week lag** | |
|  | **Unadjusted** | **Adjusted** | **Unadjusted** | **Adjusted** |
| Mobilitya | -0.068 (-0.100, -0.036) | -0.041 (-0.077, -0.005) | -0.034 (-0.046, -0.022) | -0.026 (-0.046, -0.007) |
| Days since 100th caseb |  | -0.113 (-0.195, -0.031) |  | -0.049 (-0.155, 0.057) |
| Marginal *R2* | 0.211 | 0.268 | 0.167 | 0.193 |
| Conditional *R2* | 0.680 | 0.730 | 0.690 | 0.705 |
| Likelihood ratio test | *χ2*(1) = 7.349, *p* = 0.007 | | *χ2*(1) = 0.835, *p* = 0.361 | |

a Coefficient for a 10% decrease in the mobility index.
b Coefficient for a 10-day increase since the 100th reported case in the country.
